# Supplementary material
Source: PubMed Central journal article supplement (PMC5815841)
Supplement: NIHMS941221-supplement-1.pdf [file NIHMS941221-supplement-1.pdf]

**Cell Reports, Volume 22**

**Supplemental Information**

**CD209a Synergizes with Dectin-2 and Mincle  
to Drive Severe Th17 Cell-Mediated  
Schistosome Egg-Induced Immunopathology**

**Parisa Kalantari, Yoelkys Morales, Emily A. Miller, Luis D. Jaramillo, Holly E. Ponichtera, Marcel A. Wuethrich, Cheolho Cheong, Maria C. Seminario, Joanne M. Russo, Stephen C. Bunnell, and Miguel J. Stadecker**

**Figure S1. Related to Figure 4**

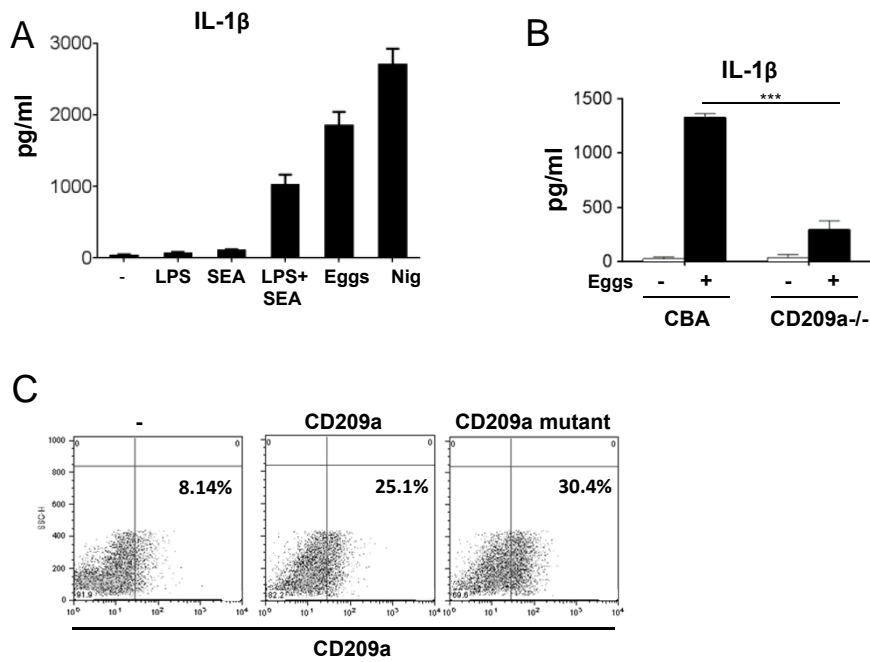

**Figure S1 (Related to Figure 3): (A) Live schistosome eggs, but not SEA, induce IL-1 $\beta$  production in the absence of LPS priming.** CBA BMDCs were cultured with LPS (100ng/ml), SEA (15 $\mu$ g/ml), both, 80 live eggs, or LPS plus nigericin (Nig) (10 $\mu$ M). IL-1 $\beta$  was measured in 24h cell supernatants by ELISA. **(B) IL-1 $\beta$  production is reduced in CD209a<sup>-/-</sup> BMDC-T cell co-cultures.** CBA and CD209a<sup>-/-</sup> BMDCs were co-cultured with 80 live schistosome eggs, naïve CD4<sup>+</sup> T cells and anti-CD3/CD28-coated beads. IL-1 $\beta$  was measured in 72h cell supernatants by ELISA. Bars are as described in Fig.3. **(C) CD209a mutant is expressed on cell surface.** BL/6 BMDCs were transduced with CD209a or CD209a mutant. Cell surface expression of CD209a and CD209a mutant was assessed by flow cytometric analysis.

**Figure S2. Related to Figures 4,5,6,7**

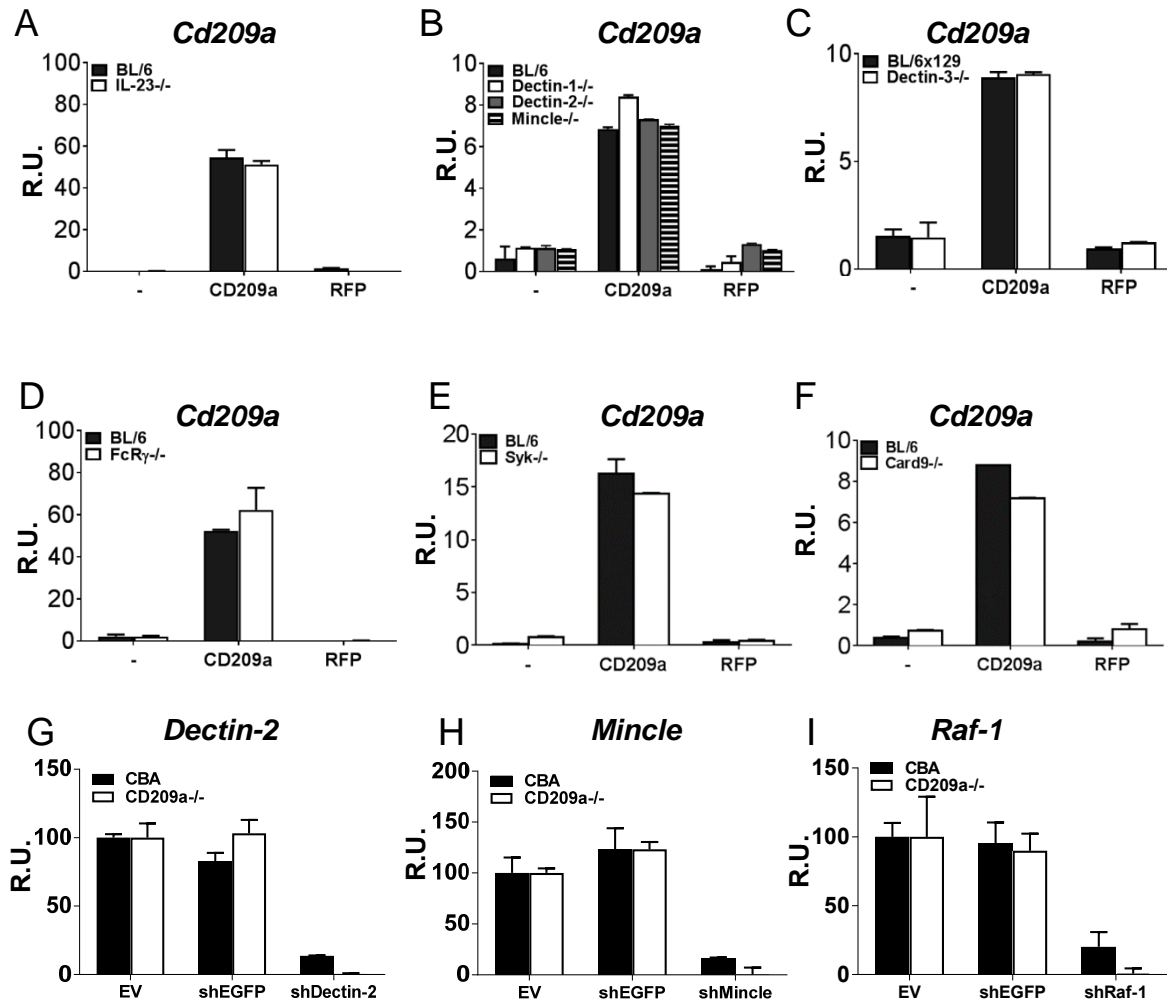

**Figure S2 (Related to Figures 4, 5, 6, 7 and S3): Verification of CD209a overexpression and Dectin-2, Mincle and Raf-1 knockdown in BMDCs.** BL/6 and (A) IL-23p19<sup>-/-</sup>, (B) Dectin-1<sup>-/-</sup>, Dectin-2<sup>-/-</sup> and Mincle<sup>-/-</sup>, (C) BL/6x129 and Dectin 3<sup>-/-</sup>, (D) FcR $\gamma$ <sup>-/-</sup>, (E) Syk<sup>-/-</sup>, and (F) Card9<sup>-/-</sup> BMDCs were not transduced or were transduced with CD209a and control RFP. CD209a overexpression was assessed by qRT-PCR. CBA or CD209a<sup>-/-</sup> BMDCs were transduced with empty vector (EV), EGFP shRNA (shEGFP), Dectin-2 shRNA (shDectin-2) (G), Mincle shRNA (shMincle) (H) and Raf-1 shRNA (shRaf-1) (I). The mRNA levels of Dectin-2 (G), Mincle (H) and Raf-1 (I) were set at 100% in cells transduced with EV. Dectin-2, Mincle and Raf-1 mRNA levels were assessed by qRT-PCR. Bars represent the mean  $\pm$  S.D. CD209a, Dectin-2, Mincle and Raf-1 relative units (R.U.) of three biological replicates from one representative experiment of three with similar results.

**Figure S3. Related to Figure 5**

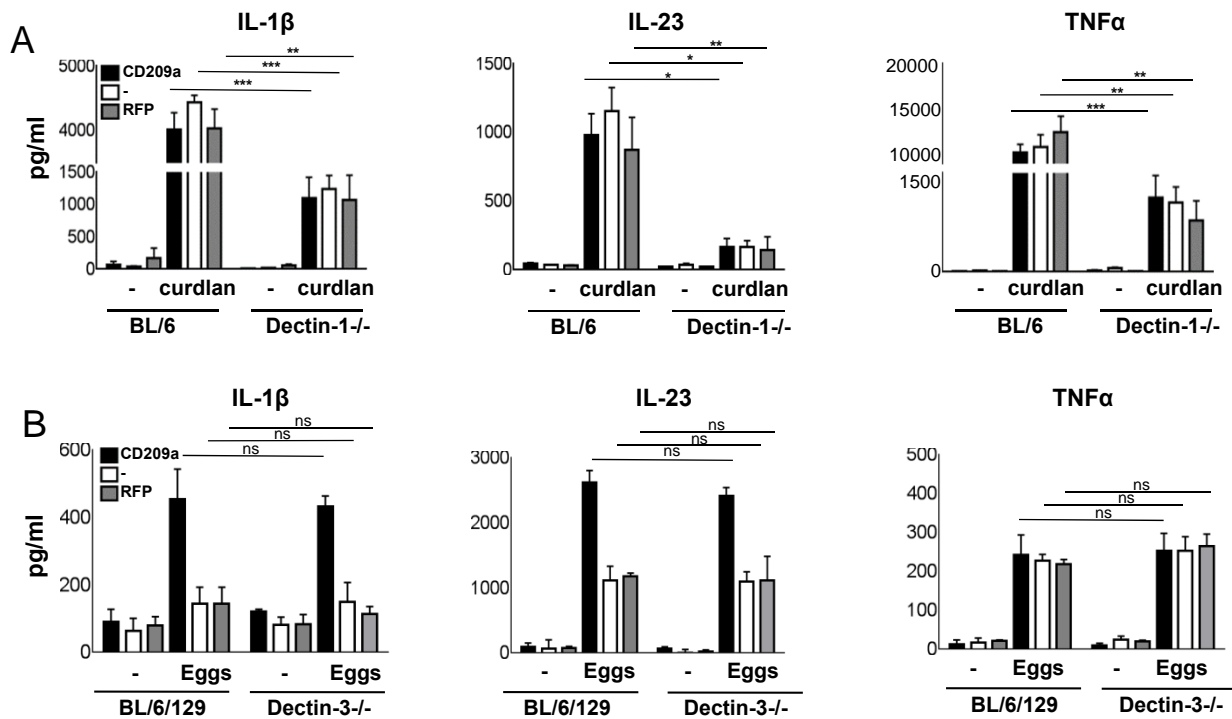

**Figure S3 (Related to Figure 5): (A) Cytokine production to curdlan is not affected by CD209a but is inhibited in the absence of Dectin-1.** BL/6 and Dectin-1<sup>-/-</sup> BMDCs were transduced with CD209a or control RFP and cultured with curdlan (100ug/ml). **(B) The absence of Dectin-3 does not affect cytokine production.** BL/6x129 and BL/6x129 Dectin 3<sup>-/-</sup> BMDCs were transduced with CD209a or control RFP and cultured with 80 live eggs. In (A), (B) IL-1 $\beta$ , IL-23 and TNF $\alpha$  were measured in 24h supernatants by ELISA. Bars are as described in Fig. 3.

**Figure S4. Related to Figure 6**

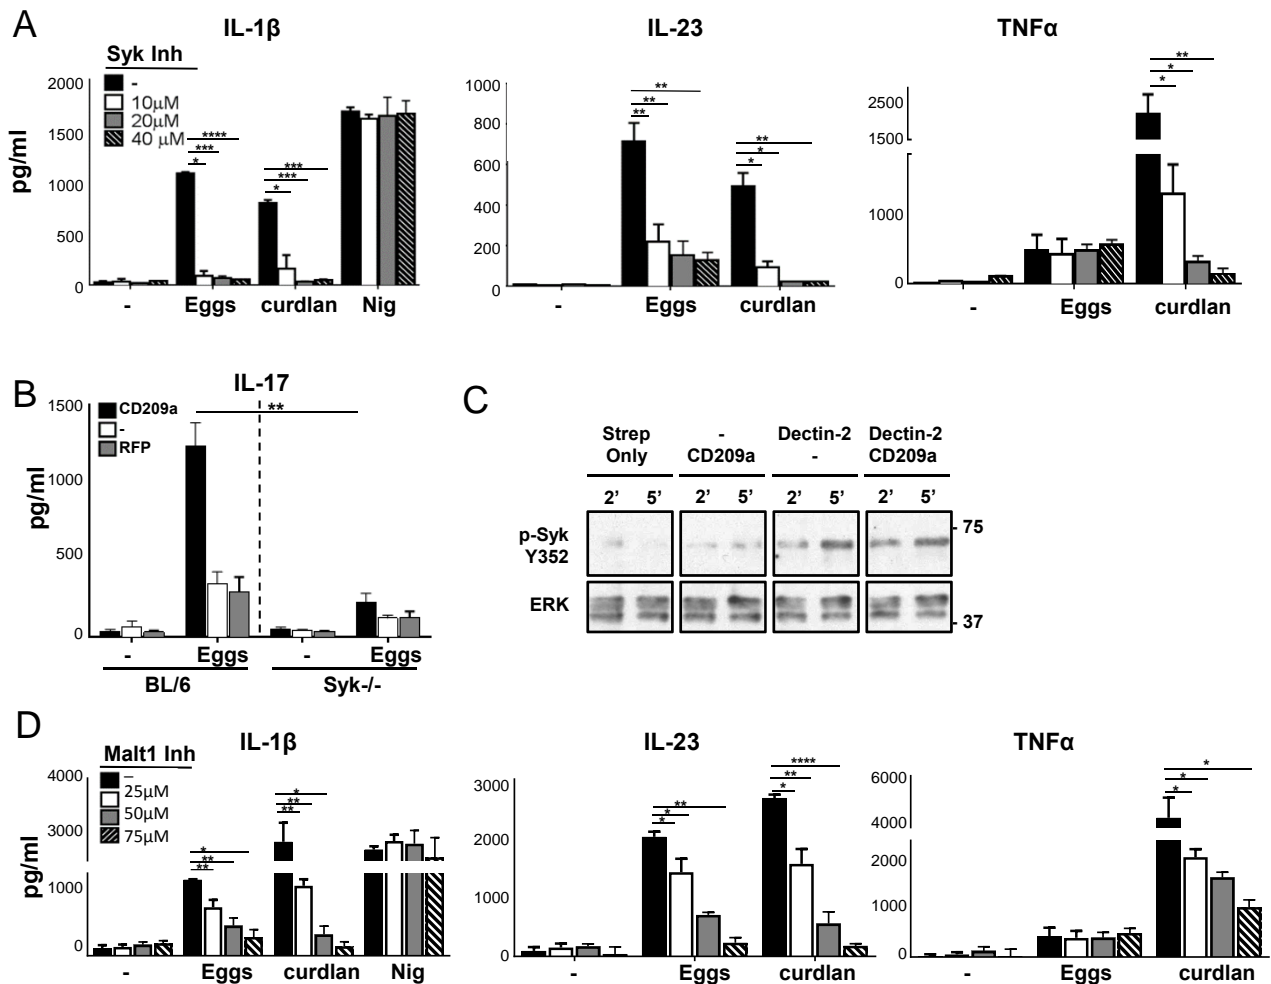

**Figure S4 (Related to Figure 6): Pharmacologic inhibition of Syk and MALT1 abrogates egg-induced production of IL-1 $\beta$  and IL-23 but not TNF $\alpha$ , and curdlan-induced production of all cytokines.** CBA BMDCs were treated with various concentrations of (A) Syk inhibitor piceatannol or (D) Malt1 inhibitor Z-VRPR-FMK for 1h and then cultured with live 80 eggs, curdlan (100ug/ml) or LPS (100ng/ml) plus Nigericin (Nig) (10uM). Cytokines in 24 h supernatants were measured by ELISA. (B) CD209a-induced increase in IL-17 is dependent on Syk. BL/6 and Syk<sup>-/-</sup> BMDCs were cultured with T cells and 80 live eggs. IL-17 in 72h supernatants was measured by ELISA. Bars are as described in Fig. 3. (C) Triggering Dectin-2, but not CD209a, induces Syk phosphorylation. 1x10<sup>6</sup> CBA BMDCs were plated in 12-well plates and incubated for 2 and 5 min with biotinylated antibodies against Dectin-2, CD209a, or both, followed by streptavidin (Strep). Cell lysates were used for western blot analysis using antibodies against phosphorylated Syk (Tyr352) and total ERK. Results are representative of 2 independent experiments.

## **SUPPLEMENTAL EXPERIMENTAL PROCEDURES**

**Flow cytometry:** Cells were blocked with rat IgG and stained with biotin-conjugated anti-CD209a (BD Biosciences) followed by Alexa Fluor 647-conjugated streptavidin (Invitrogen). Data were acquired with a FACSCallibur flow cytometer and CellQuest software version 3.2.1 (Becton Dickinson) and analyzed with FlowJo software. Cells were gated for viability by propidium iodide exclusion.
